# Supplementary material for: The complete chloroplast genome sequence of Aconitum coreanum and Aconitum carmichaelii and comparative analysis with other Aconitum species
Source: PubMed Central journal article supplement (PMC5581188; doi:10.1371/journal.pone.0184257), 2017-09-01
Supplement: pone.0184257.s003.pdf [file pone.0184257.s003.pdf]

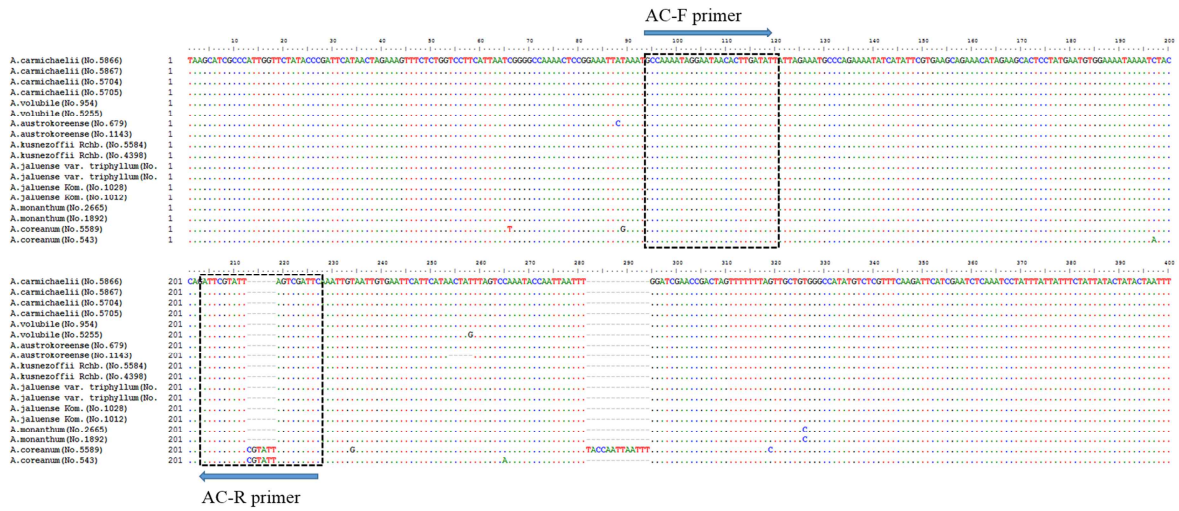

**Figure S3. Comparative analysis of *ndhC-trnV* region (IGS) using 6 *Aconitum* species. The *A. coreanum*-specific primer were designed using 6 bp insertion. Parentheses indicate KIOM voucher number.**
