# Supplementary material for: The complete chloroplast genome sequence of Aconitum coreanum and Aconitum carmichaelii and comparative analysis with other Aconitum species
Source: PubMed Central journal article supplement (PMC5581188; doi:10.1371/journal.pone.0184257), 2017-09-01
Supplement: pone.0184257.s004.pdf [file pone.0184257.s004.pdf]

**S1 Table. GenBank accession numbers of the cp genomes used in this study.**

| Order        | No.      | Family          | Taxon                                             | GenBank Accession number    |             |
|--------------|----------|-----------------|---------------------------------------------------|-----------------------------|-------------|
|              | 1        | Berberidaceae   | <i>Nandiana domestica</i>                         | DQ_923117                   |             |
|              | 2        | Berberidaceae   | <i>Berberis bealei</i>                            | NC_022457                   |             |
|              | 3        | Menispermaceae  | <i>Stephania japonica</i>                         | NC_029432.1                 |             |
|              | 4        | Lardizabalaceae | <i>Akebia trifoliata</i>                          | NC_029427.1                 |             |
|              | 5        | Lardizabalaceae | <i>Akebia quinata</i>                             | NC_033913.1                 |             |
|              | 6        | Eupteleaceae    | <i>Euptelea pleiosperma</i>                       | NC_029429.1                 |             |
|              | 7        | Papaveraceae    | <i>Coreanomecon hylomeconoides</i>                | NC_031446.1                 |             |
|              | 8        | Papaveraceae    | <i>Papaver somniferum</i>                         | NC_029434.1                 |             |
|              | 9        |                 | <i>Megaleranthis saniculifolia</i>                | NC_012615                   |             |
|              | 10       |                 | <i>Thalictrum coreanum</i>                        | NC_026103                   |             |
|              | 11       |                 | <i>Clematis fusca</i> var. <i>coreana</i>         | KM_652489                   |             |
|              | 12       |                 | <i>Anemone patens</i>                             | KR_297058                   |             |
|              | 13       |                 | <i>puldatilla vernalis</i>                        | KR_297061                   |             |
|              | 14       |                 | <i>Ranunculus macranthus</i>                      | NC_008796                   |             |
|              | 15       |                 | <i>Clematis terniflora</i>                        | NC_028000                   |             |
|              | 16       |                 | <i>Aconitum barbatum</i> var. <i>puberulum</i>    | KC_844054                   |             |
| Ranunculales | 17       |                 | <i>Aconitum chiisanense</i>                       | NC_029829.1                 |             |
|              | 18       |                 | <i>Aconitum japonicum</i> subsp. <i>napiforme</i> | KT_820670.1                 |             |
|              | 19       |                 | <i>Aconitum jaluense</i> subsp. <i>jaluense</i>   | KT_820669.1                 |             |
|              | 20       |                 | <i>Aconitum barbatum</i> var. <i>puberulum</i>    | KT_964698.1                 |             |
|              | 21       |                 | <i>Aconitum barbatum</i> var. <i>hispidum</i>     | KT_820664.1                 |             |
|              | 22       | Ranunculaceae   | <i>Aconitum monanthum</i>                         | NC_031423.1                 |             |
|              | 23       |                 | <i>Aconitum kusnezoffii</i>                       | NC_031422.1                 |             |
|              | 24       |                 | <i>Aconitum kusnezoffii</i>                       | KT_964696.1                 |             |
|              | 25       |                 | <i>Aconitum coreanum</i>                          | NC_031421.1                 |             |
|              | 26       |                 | <i>Aconitum ciliare</i>                           | NC_031420.1                 |             |
|              | 27       |                 | <i>Aconitum monanthum</i>                         | KT_820672.1                 |             |
|              | 28       |                 | <i>Aconitum jaluense</i> subsp. <i>jaluense</i>   | KT_820668.1                 |             |
|              | 29       |                 | <i>Aconitum ciliare</i>                           | KT_820666.1                 |             |
|              | 30       |                 | <i>Aconitum carmichaelii</i>                      | NC_030761.1                 |             |
|              | 31       |                 | <i>Aconitum volubile</i>                          | KU_556690                   |             |
|              | 32       |                 | <i>Aconitum austrokoreense</i>                    | KY_407559                   |             |
|              | 33       |                 | <i>Aconitum pseudolaeve</i>                       | KY_407562                   |             |
|              | 34       |                 | <i>Aconitum longecassidatum</i>                   | KY_407561                   |             |
| outgroup     | asterids | 35              | Solanaceae                                        | <i>Nicotiana tabacum</i>    | NC_001879.2 |
| outgroup     | rosids   | 36              | Brassicaceae                                      | <i>Arabidopsis thaliana</i> | AP000423.1  |
