# Supplementary material for: The complete chloroplast genome sequence of Aconitum coreanum and Aconitum carmichaelii and comparative analysis with other Aconitum species
Source: PubMed Central journal article supplement (PMC5581188; doi:10.1371/journal.pone.0184257), 2017-09-01
Supplement: pone.0184257.s005.pdf [file pone.0184257.s005.pdf]

**S2 Table. Raw read and trimmed read data.**

| Species                                    | Input reads | Trimmed reads |        | Total raw bases | Trimmed bases |        |
|--------------------------------------------|-------------|---------------|--------|-----------------|---------------|--------|
| <i>Aconitum carmichaelii</i> Debeaux       | 34,093,340  | 21,589,191    | 63.32% | 5,124,848,866   | 2,849,320,226 | 55.60% |
| <i>Aconitum coreanum</i> (H.Lév.) Rapaics. | 34,061,576  | 21,603,072    | 63.42% | 5,145,840,765   | 2,846,052,166 | 55.57% |
