# Supplementary material for: The complete chloroplast genome sequence of Aconitum coreanum and Aconitum carmichaelii and comparative analysis with other Aconitum species
Source: PubMed Central journal article supplement (PMC5581188; doi:10.1371/journal.pone.0184257), 2017-09-01
Supplement: pone.0184257.s006.pdf [file pone.0184257.s006.pdf]

**S3 Table. *Aconitum* cp genome assembly information.**

| <b>Species</b>         | <b>Aligned reads to the cp genome</b> | <b>Cp genome coverage (×)</b> | <b>Cp genome length (bp)</b> | <b># of contigs</b> |
|------------------------|---------------------------------------|-------------------------------|------------------------------|---------------------|
| <i>A. carmichaelii</i> | 244,334                               | 206.52                        | 155,880                      | 5                   |
| <i>A. coreanum</i>     | 321,623                               | 268.92                        | 157,040                      | 10                  |
