# Supplementary material for: The complete chloroplast genome sequence of Aconitum coreanum and Aconitum carmichaelii and comparative analysis with other Aconitum species
Source: PubMed Central journal article supplement (PMC5581188; doi:10.1371/journal.pone.0184257), 2017-09-01
Supplement: pone.0184257.s007.pdf [file pone.0184257.s007.pdf]

**S4 Table. The genes with introns in the chloroplast genomes of *Aconitum* species and the lengths of exons and introns.**

| <i>A. carmichaelii</i>    | Region | Exon I | Intron I | Exon II | Intron II | Exon III |
|---------------------------|--------|--------|----------|---------|-----------|----------|
| <i>trnk-UUU</i>           | LSC    | 37     | 2523     | 35      |           |          |
| <i>trnG-UCC</i>           | LSC    | 23     | 721      | 48      |           |          |
| <i>atpF</i>               | LSC    | 145    | 731      | 410     |           |          |
| <i>rpoC1</i>              | LSC    | 432    | 769      | 1611    |           |          |
| <i>ycf3</i>               | LSC    | 124    | 722      | 230     | 765       | 153      |
| <i>trnL-UAA</i>           | LSC    | 35     | 495      | 50      |           |          |
| <i>trnV-UAC</i>           | LSC    | 39     | 592      | 37      |           |          |
| <i>rps12*</i>             | LSC    | 114    | -        | 232     | -         | 26       |
| <i>clpP</i>               | LSC    | 71     | 847      | 292     | 676       | 246      |
| <i>petB</i>               | LSC    | 6      | 817      | 642     |           |          |
| <i>petD</i>               | LSC    | 8      | 722      | 496     |           |          |
| <i>rpl16</i>              | LSC    | 9      | 1123     | 399     |           |          |
| <i>rpl2</i>               | IR     | 391    | 667      | 434     |           |          |
| <i>ndhB</i>               | IR     | 777    | 702      | 756     |           |          |
| <i>trnI-GAU</i>           | IR     | 42     | 937      | 35      |           |          |
| <i>trnA-UGC</i>           | IR     | 38     | 802      | 35      |           |          |
| <i>ndhA</i>               | SSC    | 553    | 1009     | 539     |           |          |
| <b><i>A. coreanum</i></b> |        |        |          |         |           |          |
| <i>trnk-UUU</i>           | LSC    | 37     | 2527     | 35      |           |          |
| <i>trnG-UCC</i>           | LSC    | 23     | 720      | 48      |           |          |
| <i>atpF</i>               | LSC    | 145    | 726      | 410     |           |          |
| <i>rpoC1</i>              | LSC    | 432    | 768      | 1611    |           |          |
| <i>ycf3</i>               | LSC    | 124    | 726      | 230     | 759       | 153      |
| <i>trnL-UAA</i>           | LSC    | 35     | 503      | 50      |           |          |
| <i>trnV-UAC</i>           | LSC    | 39     | 602      | 37      |           |          |
| <i>rps12</i>              | LSC    | 114    | -        | 232     | -         | 26       |
| <i>clpP</i>               | LSC    | 71     | 883      | 292     | 676       | 246      |
| <i>petB</i>               | LSC    | 6      | 811      | 642     |           |          |
| <i>petD</i>               | LSC    | 8      | 705      | 496     |           |          |
| <i>rpl16</i>              | LSC    | 9      | 1120     | 399     |           |          |
| <i>rpl2</i>               | IR     | 391    | 667      | 434     |           |          |
| <i>ndhB</i>               | IR     | 777    | 702      | 756     |           |          |
| <i>trnI-GAU</i>           | IR     | 42     | 936      | 36      |           |          |
| <i>trnA-UGC</i>           | IR     | 38     | 797      | 35      |           |          |
| <i>ndhA</i>               | SSC    | 553    | 1014     | 539     |           |          |

\**rps12* gene is a trans-splicing gene.
