# Supplementary material for: The complete chloroplast genome sequence of Aconitum coreanum and Aconitum carmichaelii and comparative analysis with other Aconitum species
Source: PubMed Central journal article supplement (PMC5581188; doi:10.1371/journal.pone.0184257), 2017-09-01
Supplement: pone.0184257.s008.pdf [file pone.0184257.s008.pdf]

**S5 Table. Codon-anticodon recognition pattern and codon usage for *Aconitum* cp genomes.**

| Amino acid | Codon | <i>A. carmichaelii</i> |       | <i>A. coreanum</i> |      | tRNA                                                     |
|------------|-------|------------------------|-------|--------------------|------|----------------------------------------------------------|
|            |       | Count                  | RSCU* | Count              | RSCU |                                                          |
| Phe        | UUU   | 933                    | 1.27  | 937                | 1.27 |                                                          |
| Phe        | UUC   | 534                    | 0.73  | 536                | 0.73 | <i>trnF-GAA</i>                                          |
| Leu        | UUA   | 835                    | 1.81  | 833                | 1.81 | <i>trnL-UAA</i>                                          |
| Leu        | UUG   | 587                    | 1.27  | 584                | 1.27 | <i>trnL-CAA</i>                                          |
| Leu        | CUU   | 567                    | 1.23  | 565                | 1.23 |                                                          |
| Leu        | CUC   | 197                    | 0.43  | 199                | 0.43 |                                                          |
| Leu        | CUA   | 386                    | 0.84  | 385                | 0.84 | <i>trnL-UAG</i>                                          |
| Leu        | CUG   | 194                    | 0.42  | 189                | 0.41 |                                                          |
| Ile        | AUU   | 1084                   | 1.45  | 1077               | 1.44 |                                                          |
| Ile        | AUC   | 456                    | 0.61  | 466                | 0.62 | <i>trnI-GAU</i>                                          |
| Ile        | AUA   | 703                    | 0.94  | 696                | 0.93 | <i>trnI-CAU</i><br><i>trn(f)M-CAU</i><br><i>trnM-CAU</i> |
| Met        | AUG   | 637                    | 1     | 641                | 1    | <i>trnM-CAU</i>                                          |
| Val        | GUU   | 528                    | 1.47  | 529                | 1.46 |                                                          |
| Val        | GUC   | 164                    | 0.46  | 163                | 0.45 | <i>trnV-GAC</i>                                          |
| Val        | GUA   | 547                    | 1.52  | 551                | 1.52 | <i>trnV-UAC</i>                                          |
| Val        | GUG   | 202                    | 0.56  | 204                | 0.56 |                                                          |
| Ser        | UCU   | 568                    | 1.68  | 562                | 1.67 |                                                          |
| Ser        | UCC   | 340                    | 1     | 344                | 1.02 | <i>trnS-GGA</i>                                          |
| Ser        | UCA   | 417                    | 1.23  | 415                | 1.23 | <i>trnS-UGA</i>                                          |
| Ser        | UCG   | 192                    | 0.57  | 192                | 0.57 |                                                          |
| Pro        | CCU   | 427                    | 1.5   | 427                | 1.5  |                                                          |
| Pro        | CCC   | 223                    | 0.78  | 221                | 0.78 | <i>trnS-GCU</i>                                          |
| Pro        | CCA   | 337                    | 1.18  | 342                | 1.2  |                                                          |
| Pro        | CCG   | 152                    | 0.53  | 149                | 0.52 |                                                          |
| Thr        | ACU   | 533                    | 1.55  | 538                | 1.58 | <i>trnP-UGG</i>                                          |
| Thr        | ACC   | 261                    | 0.76  | 254                | 0.74 |                                                          |
| Thr        | ACA   | 420                    | 1.22  | 420                | 1.23 |                                                          |
| Thr        | ACG   | 159                    | 0.46  | 154                | 0.45 | <i>trnT-GGU</i>                                          |
| Ala        | GCU   | 598                    | 1.71  | 598                | 1.72 | <i>trnT-UGU</i>                                          |
| Ala        | GCC   | 228                    | 0.65  | 229                | 0.66 |                                                          |
| Ala        | GCA   | 394                    | 1.13  | 395                | 1.13 |                                                          |
| Ala        | GCG   | 179                    | 0.51  | 172                | 0.49 |                                                          |
| Tyr        | UAU   | 773                    | 1.59  | 768                | 1.58 | <i>trnA-UGC</i>                                          |
| Tyr        | UAC   | 202                    | 0.41  | 203                | 0.42 |                                                          |
| Stop       | UAA   | 40                     | 1.4   | 39                 | 1.36 |                                                          |
| Stop       | UAG   | 25                     | 0.87  | 25                 | 0.87 | <i>trnY-GUA</i>                                          |
| His        | CAU   | 513                    | 1.51  | 513                | 1.5  |                                                          |
| His        | CAC   | 168                    | 0.49  | 169                | 0.5  |                                                          |
| Gln        | CAA   | 693                    | 1.5   | 691                | 1.51 |                                                          |

|      |     |      |      |      |      |                 |
|------|-----|------|------|------|------|-----------------|
| Gln  | CAG | 228  | 0.5  | 222  | 0.49 |                 |
| Asn  | AAU | 989  | 1.53 | 986  | 1.54 | <i>trnH-GUG</i> |
| Asn  | AAC | 301  | 0.47 | 297  | 0.46 | <i>trnQ-UUG</i> |
| Lys  | AAA | 1004 | 1.45 | 997  | 1.45 |                 |
| Lys  | AAG | 383  | 0.55 | 382  | 0.55 |                 |
| Asp  | GAU | 886  | 1.6  | 886  | 1.6  | <i>trnN-GUU</i> |
| Asp  | GAC | 222  | 0.4  | 222  | 0.4  | <i>trnK-UUU</i> |
| Glu  | GAA | 1007 | 1.46 | 1013 | 1.47 |                 |
| Glu  | GAG | 373  | 0.54 | 368  | 0.53 |                 |
| Cys  | UGU | 227  | 1.46 | 226  | 1.46 | <i>trnD-GUC</i> |
| Cys  | UGC | 83   | 0.54 | 84   | 0.54 | <i>trnE-UUC</i> |
| Stop | UGA | 21   | 0.73 | 22   | 0.77 |                 |
| Trp  | UGG | 479  | 1    | 477  | 1    |                 |
| Arg  | CGU | 360  | 1.33 | 362  | 1.35 | <i>trnC-GCA</i> |
| Arg  | CGC | 94   | 0.35 | 91   | 0.34 | <i>trnW-CCA</i> |
| Arg  | CGA | 363  | 1.35 | 360  | 1.34 | <i>trnR-ACG</i> |
| Arg  | CGG | 117  | 0.43 | 116  | 0.43 |                 |
| Ser  | AGU | 395  | 1.17 | 392  | 1.17 |                 |
| Ser  | AGC | 118  | 0.35 | 113  | 0.34 |                 |
| Arg  | AGA | 502  | 1.86 | 505  | 1.88 | <i>trnR-UCU</i> |
| Arg  | AGG | 182  | 0.67 | 180  | 0.67 |                 |
| Gly  | GGU | 601  | 1.34 | 606  | 1.34 |                 |
| Gly  | GGC | 185  | 0.41 | 182  | 0.4  | <i>trnG-GCC</i> |
| Gly  | GGA | 721  | 1.6  | 724  | 1.6  | <i>trnG-UCC</i> |
| Gly  | GGG | 293  | 0.65 | 299  | 0.66 |                 |

---

\*RSCU – Relative synonymous codon usage.
