# Supplementary material for: The complete chloroplast genome sequence of Aconitum coreanum and Aconitum carmichaelii and comparative analysis with other Aconitum species
Source: PubMed Central journal article supplement (PMC5581188; doi:10.1371/journal.pone.0184257), 2017-09-01
Supplement: pone.0184257.s009.pdf [file pone.0184257.s009.pdf]

**S6 Table. Base composition of the chloroplast genomes of two *Aconitum* species**

| <i>A. carmichaelii</i> | A (%) | T (%) | G (%) | C (%) | length (bp) |
|------------------------|-------|-------|-------|-------|-------------|
| LSC                    | 31.4  | 32.4  | 17.7  | 18.5  | 86,348      |
| SSC                    | 34.0  | 33.3  | 15.2  | 17.5  | 16,946      |
| IR                     | 28.5  | 28.5  | 21.5  | 21.5  | 52,586      |
| Total                  | 30.7  | 31.2  | 18.7  | 19.4  | 155,888     |
| CDS                    | 30.6  | 31.1  | 20.4  | 17.9  | 79,590      |
| First position         | 30.6  | 24    | 26.9  | 18.9  | 26,530      |
| Second position        | 29.4  | 32    | 17.9  | 20.5  | 26,530      |
| Third position         | 31.6  | 38    | 16.5  | 14.2  | 26,530      |
| <i>A. coreanum</i>     |       |       |       |       |             |
| LSC                    | 31.5  | 32.5  | 17.7  | 18.4  | 87,628      |
| SSC                    | 34.1  | 33.2  | 15.2  | 17.4  | 16,924      |
| IR                     | 28.5  | 28.5  | 21.5  | 21.5  | 52,488      |
| Total                  | 30.8  | 31.2  | 18.7  | 19.3  | 157,040     |
| CDS                    | 30.5  | 31.2  | 20.4  | 17.9  | 79,461      |
| First position         | 30.6  | 24    | 27.0  | 18.9  | 26,487      |
| Second position        | 29.4  | 32    | 17.9  | 20.4  | 26,487      |
| Third position         | 31.7  | 38    | 14.2  | 16.4  | 26,487      |
