# Supplementary material for: The complete chloroplast genome sequence of Aconitum coreanum and Aconitum carmichaelii and comparative analysis with other Aconitum species
Source: PubMed Central journal article supplement (PMC5581188; doi:10.1371/journal.pone.0184257), 2017-09-01
Supplement: pone.0184257.s010.pdf [file pone.0184257.s010.pdf]

**S7 Table. Distribution of tandem repeats in the cp genomes of two *Aconitum* species.**

| <b>Tandem repeat<br/>(<i>A. carmichaelii</i>)</b> | <b>Position</b>                   | <b>Repeat unit<br/>length (bp)</b> | <b>Repeat unit sequence</b> | <b>Repeat<br/>numbers</b> | <b>Region</b> |
|---------------------------------------------------|-----------------------------------|------------------------------------|-----------------------------|---------------------------|---------------|
| 1                                                 | IGS ( <i>trnK-UUU, rps16</i> )    | 13                                 | TTTTCAAGTAAA                | 2                         | LSC           |
| 2                                                 | IGS ( <i>trnK-UUU, rps16</i> )    | 19                                 | TATAGTTATAGTATATATA         | 2                         | LSC           |
| 3                                                 | IGS ( <i>trnS-GCU, trnG-UCC</i> ) | 19                                 | TACACATGAAGTAAAGAAA         | 2                         | LSC           |
| 4                                                 | IGS ( <i>atpF, atpH</i> )         | 20                                 | TATTGTAGGAGTGAAATCGT        | 2                         | LSC           |
| 5                                                 | Intron ( <i>rpoC1</i> )           | 20                                 | ACGAGGTACAACACTAGTAATT      | 2                         | LSC           |
| 6                                                 | IGS ( <i>rpoB, trnC-GCA</i> )     | 21                                 | TGGATCGATCTAGTAATGATG       | 2                         | LSC           |
| 7                                                 | IGS ( <i>trnT-UGU, trnL-UAA</i> ) | 23                                 | TATGTAACATAAAGAAAAATATAA    | 2                         | LSC           |
| 8                                                 | Exon ( <i>petG</i> )              | 17                                 | TTAAGTAACATCTCTTT           | 2                         | LSC           |
| 9                                                 | IGS ( <i>rps18, rpl20</i> )       | 18                                 | TGTATCCCTCCCTTATC           | 2                         | LSC           |
| 10                                                | Intron ( <i>clpP</i> )            | 13                                 | TTTTATAGTTAAA               | 2                         | LSC           |
| 11                                                | Intron ( <i>petB</i> )            | 18                                 | ATTCATCTATTAATTGA           | 2                         | LSC           |
| 12                                                | Exon ( <i>rps11</i> )             | 24                                 | ACGTCCATTCTACGCGAGCCAAT     | 2                         | LSC           |
| 13                                                | Exon ( <i>ycf2</i> )              | 15                                 | AAGAGGATGAGCTTC             | 3                         | IR            |
| 14                                                | Exon ( <i>ycf1</i> )              | 15                                 | TTAATATAATAAAAAT            | 2                         | SSC           |
| 15                                                | IGS ( <i>rps15, ycf1</i> )        | 16                                 | TACAATACACAAAAAT            | 2                         | SSC           |
| 16                                                | Exon ( <i>ycf1</i> )              | 12                                 | TACTCCTAAAAA                | 2                         | SSC           |
| 17                                                | Exon ( <i>ycf2</i> )              | 15                                 | TCATCCTCTGAAGC              | 3                         | IR            |
| 18                                                | Exon ( <i>ycf2</i> )              | 18                                 | ATCATCAAT                   | 3                         | IR            |
| <b>Tandem repeat<br/>(<i>A. coreanum</i>)</b>     |                                   |                                    |                             |                           |               |
| 1                                                 | IGS ( <i>trnK-UUU, rps16</i> )    | 13                                 | TTTTCAAGTAAA                | 2                         | LSC           |
| 2                                                 | IGS ( <i>trnK-UUU, rps16</i> )    | 19                                 | TATAGTTATAGTATATATA         | 2                         | LSC           |
| 3                                                 | IGS ( <i>trnS-GCU, trnG-UCC</i> ) | 19                                 | TACACATGAAGTAAAGAAA         | 2                         | LSC           |
| 4                                                 | IGS ( <i>atpF, atpH</i> )         | 20                                 | TATTGTAGGAGTGAAATCGT        | 2                         | LSC           |
| 5                                                 | Intron ( <i>rpoC1</i> )           | 20                                 | ACGAGGTACAACACTAGTAATT      | 2                         | LSC           |
| 6                                                 | IGS ( <i>rpoB, trnC-GCA</i> )     | 21                                 | TGGATCGATCTAGTAATGATG       | 2                         | LSC           |
| 7                                                 | IGS ( <i>trnT-UGU, trnL-UAA</i> ) | 23                                 | TATGTAACATAAAGAAAAATATAA    | 2                         | LSC           |
| 8                                                 | Exon ( <i>petG</i> )              | 17                                 | TTAAGTAACATCTCTTT           | 2                         | LSC           |
| 9                                                 | IGS ( <i>rps18, rpl20</i> )       | 18                                 | TGTATCCCTCCCTTATC           | 2                         | LSC           |
| 10                                                | Intron ( <i>clpP</i> )            | 13                                 | TTTTATAGTTAAA               | 2                         | LSC           |
| 11                                                | Intron ( <i>petB</i> )            | 18                                 | ATTCATCTATTAATTGA           | 2                         | LSC           |
| 12                                                | Exon ( <i>rps11</i> )             | 24                                 | ACGTCCATTCTACGCGAGCCAAT     | 2                         | LSC           |
| 13                                                | Exon ( <i>ycf2</i> )              | 15                                 | AAGAGGATGAGCTTC             | 3                         | IR            |
| 14                                                | Exon ( <i>ycf1</i> )              | 15                                 | TTAATATAATAAAAAT            | 2                         | SSC           |
| 15                                                | IGS ( <i>rps15, ycf1</i> )        | 16                                 | TACAATACACAAAAAT            | 2                         | SSC           |
| 16                                                | Exon ( <i>ycf1</i> )              | 12                                 | TACTCCTAAAAA                | 2                         | SSC           |
| 17                                                | Exon ( <i>ycf2</i> )              | 15                                 | TCATCCTCTGAAGC              | 3                         | IR            |
| 18                                                | Exon ( <i>ycf2</i> )              | 18                                 | ATCATCAAT                   | 3                         | IR            |
